# Supplementary material for: Mg2−xCaxAl layered double hydroxide-derived mixed metal oxide porous hexagonal nanoplatelets for CO2 sorption
Source: Royal Society of Chemistry journal article supplement (doi:10.1039/d4dt01647e), 2024-01-01
Supplement: d4dt01647e1.pdf [file d4dt01647e1.pdf]

## Supplementary Information

### Mg<sub>2-x</sub>Ca<sub>x</sub>Al Layered Double Hydroxide Derived Mixed Metal Oxide Porous Hexagonal Nanoplatelets for CO<sub>2</sub> Sorption

Bhojaraj,<sup>a</sup> C. Nethravathi<sup>\*a,b</sup> and Michael Rajamathi<sup>\*a</sup>

<sup>a</sup>Materials Research Group, St. Joseph's University, 36, Lalbagh Road, Bangalore 560027, India. michael.rajamathi@sju.edu.in

<sup>b</sup>Department of Chemistry, Mount Carmel College, Bangalore 560052, India. nethravathic@gmail.com

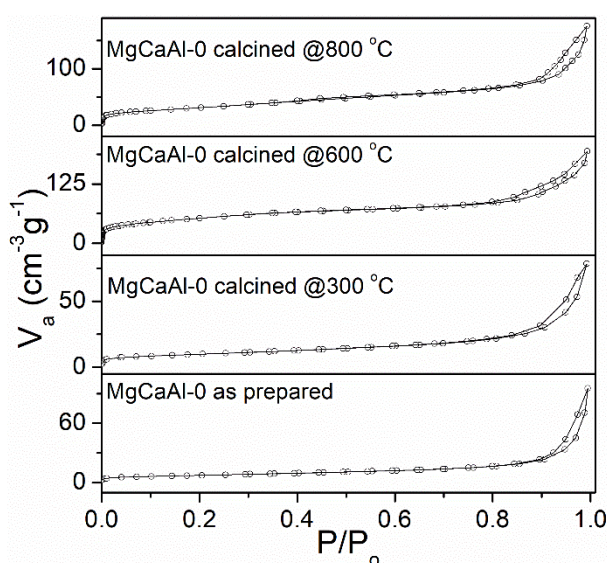

**Figure S1** BET surface area of as prepared and calcined Mg<sub>2-x</sub>Ca<sub>x</sub>Al-CO<sub>3</sub> layered double hydroxides hexagonal nanoplatelets with x=0.

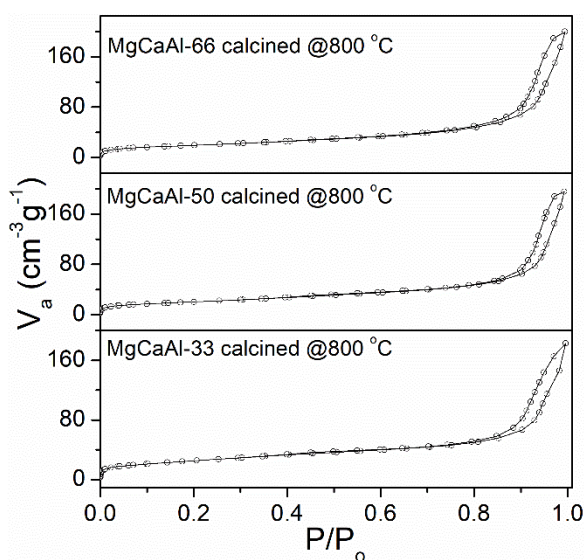

**Figure S2** BET surface area of calcined Mg<sub>2-x</sub>Ca<sub>x</sub>Al-CO<sub>3</sub> layered double hydroxides hexagonal nanoplatelets with x=33, 50 and 66.
